1 **Cas9/CRISPR genome editing to demonstrate the contribution of Cyp51A Gly138Ser to**  
2 **azole resistance in *Aspergillus fumigatus***

3

4 Takashi Umeyama<sup>a#</sup>, Yuta Hayashi<sup>b</sup>, Hisaki Shimosaka<sup>c\*</sup>, Tatsuya Inukai<sup>a</sup>, Satoshi Yamagoe<sup>a</sup>,  
5 Shogo Takatsuka<sup>a</sup>, Yasutaka Hoshino<sup>a</sup>, Minoru Nagi<sup>a</sup>, Shigeki Nakamura<sup>a</sup>, Katsuhiko Kamei<sup>d</sup>,  
6 Kenji Ogawa<sup>b</sup>, Yoshitsugu Miyazaki<sup>a</sup>.

7

8 <sup>a</sup>Department of Chemotherapy and Mycoses, National Institute of Infectious Diseases, Tokyo,  
9 Japan.

10 <sup>b</sup>Department of Respiratory Medicine, National Hospital Organization Higashinagoya National  
11 Hospital, Aichi, Japan.

12 <sup>c</sup>Department of Clinical Laboratory, National Hospital Organization Higashinagoya National  
13 Hospital, Aichi, Japan.

14 <sup>d</sup>Medical Mycology Research Center, Chiba University, Chiba, Japan.

15

16 Running head: Involvement of Cyp51A G138S in *A. fumigatus* azole resistance

17

18 #Address correspondence to Takashi Umeyama, [umeyama@nih.go.jp](mailto:umeyama@nih.go.jp).

19 \*Present address: Hisaki Shimosaka, National Center for Geriatrics and Gerontology, Aichi,  
20 Japan.

21

22 Keywords: azole drugs, antifungal resistance, Cyp51A, Cas9, CRISPR, genome editing

23 **Abstract**

24 Azole resistance in *Aspergillus fumigatus* is predominantly associated with increased expression  
25 of Cyp51A (lanosterol 14 $\alpha$ -demethylase), the target enzyme of azole antifungal agents, or with  
26 single-nucleotide polymorphisms (SNPs) in *cyp51A*. Although several SNPs that may be linked  
27 to low susceptibility in azole-resistant isolates have previously been reported, few studies have  
28 been conducted to conclusively demonstrate the contribution of SNPs to decreased azole  
29 susceptibility. An *A. fumigatus* strain was isolated from the sputum of a 74-year-old male  
30 receiving long-term voriconazole treatment for chronic progressive pulmonary aspergillosis.  
31 Etest antifungal susceptibility testing showed low susceptibility to voriconazole, itraconazole,  
32 and posaconazole. Nucleotide sequencing of *cyp51A* from this isolate revealed the mutations  
33 Gly138Ser (GGC→AGC) and Asn248Lys (AAT→AAA) compared with the *cyp51A* of  
34 azole-susceptible isolates. PCR-amplified DNA fragments containing *cyp51A* with or without the  
35 mutations of interest and a hygromycin marker were simultaneously introduced along with the  
36 Cas9 protein and *in vitro*-synthesized single-guide RNA into protoplasts of the  
37 azole-resistant/susceptible strains. Etest azole susceptibility testing of recombinant strains  
38 showed an increased susceptibility via the replacement of Ser138 by glycine. In contrast, azole  
39 susceptibility was slightly decreased when a Ser138 mutation was introduced into the  
40 azole-susceptible strain AfS35, indicating that the serine at position 138 of Cyp51A contributes  
41 to low susceptibility in the azole-resistant isolate. Genetic recombination, which has been  
42 hampered thus far in clinical isolates, can now be achieved using Cas9/CRISPR genome editing.  
43 This technique could be useful to investigate the contribution of other SNPs of *cyp51A* to azole  
44 resistance.

45

## 46 **Introduction**

47 The filamentous fungi *Aspergillus fumigatus* is the most common opportunistic human fungal  
48 pathogen, with a wide range of clinical features including invasive pulmonary aspergillosis,  
49 chronic progressive pulmonary aspergillosis (CPPA), and allergic bronchopulmonary  
50 aspergillosis (1). Triazole antifungal drugs are the most common treatment for *A. fumigatus*  
51 infection. Itraconazole (ITC) and voriconazole (VRC) are the only oral drug treatment options  
52 for aspergillosis, which may lead to long-term administration. Since the discovery of the first  
53 ITC-resistant isolate in 1997 (2), epidemiological reports of new triazole-resistant isolates have  
54 been increasing worldwide (3). Mechanisms of acquired azole resistance may be explained by  
55 extended periods of azole exposure in the host or by environmental exposure of *A. fumigatus* to  
56 agricultural fungicides.

57

58 The primary molecular mechanisms of triazole resistance in *A. fumigatus* isolates are mutations  
59 that alter the target protein Cyp51A and prevent its interaction with the drug (4). Mutations in  
60 *cyp51A* may be classified as single-nucleotide polymorphisms (SNPs) and/or tandem repeats in  
61 the promoter region (3). The major SNPs affecting Cyp51A are positioned at Gly54, Gly138,  
62 Met220, and Gly448. The clinical isolates having these SNPs demonstrate various azole  
63 susceptibility profiles; for example, isolates with SNPs at Gly54 show resistance to ITC and  
64 varied susceptibility to posaconazole (POS) and VRC, whereas isolates with SNPs at Gly138  
65 show resistance to pan-azoles, including ITC, POS, and VRC. Another alteration is a tandem  
66 repeat in the promoter region that results in the overexpression of *cyp51A*. Two major classes of  
67 such azole-resistant mutants are TR34/Leu98His and TR46/Tyr121Phe/Thr289Ala, which carry a  
68 34-bp and a 46-bp sequence duplication, respectively, as well as amino acid substitutions.

69 Although many SNPs in *cyp51A* that may be linked to low susceptibility in azole-resistant  
70 isolates have been previously reported, few studies have been conducted to conclusively  
71 demonstrate the contribution of SNPs to decreased azole susceptibility in clinical isolates. One  
72 obstacle affecting the molecular analysis of clinical *A. fumigatus* isolates is the production of  
73 genetically manipulated mutants, as the efficiency of homologous recombination is extremely  
74 low.

75  
76 Cas9/CRISPR (the clustered regularly interspaced short palindromic repeats) is essentially a  
77 bacterial defense system for adaptive immunity against invading nucleic acids and has been  
78 applied as a powerful genome editing tool in various organisms (5). By forming a  
79 ribonucleoprotein complex with an artificial single-guide RNAs (sgRNAs) designed to target a  
80 cellular gene, the Cas9 nuclease efficiently introduces double-stranded breaks (DSBs) at the  
81 corresponding target locus (6). The sgRNA hybridizes to its complementary DNA sequence,  
82 immediately upstream of the protospacer adjacent motif (PAM), which consists of NGG for the  
83 *Streptococcus pyrogenes* Cas9 variant (7). DSBs in the target genomic DNA can be repaired  
84 either by homology-directed repair or non-homologous end joining (NHEJ) (5, 8, 9). DNA repair  
85 via homology-directed repair requires a homologous DNA template with sequence similarity to  
86 the adjacent region of the DSB locus, whereas NHEJ ligates the DSB, leading to indels in a  
87 template-independent manner. The Cas9/CRISPR system has also been successfully applied to  
88 *A. fumigatus* (10-12).

89  
90 In the present study, we investigated the antifungal mechanisms of a pan-azole-resistant strain  
91 isolated from a patient receiving long-term VRC treatment for CPPA. Although two

92 polymorphisms were found in *cyp51A* from the isolate, it was unclear which of the SNPs  
93 contributed to low azole susceptibility. We genetically demonstrated that one of the SNPs  
94 predominantly contributes to low susceptibility in the azole-resistant clinical isolate using a  
95 Cas9/CRISPR genome editing technique.

96 **Methods**

97 ***A. fumigatus* strains and media.** The *A. fumigatus* strains used in the present study are listed in  
98 Table 1. A clinical isolate NIID0345 was obtained in 2016 from the sputum sample of a  
99 74-year-old male patient with CPPA, who had received VRC treatment for 3 years. *A. fumigatus*  
100 cultures were routinely grown in *Aspergillus* minimal medium (AMM: 10 g glucose, 0.516 g  
101 KCl, 0.516 g MgSO<sub>4</sub>·7H<sub>2</sub>O, 1.516 g KH<sub>2</sub>PO<sub>4</sub>, 1.516 g Mg(NO<sub>3</sub>)<sub>2</sub>·6H<sub>2</sub>O, 1 mL trace elements  
102 (13) in 1 L distilled water), Czapek-Dox medium (CD, BD Difco Laboratories Inc., Franklin  
103 Lakes, NJ), YG medium (13), or potato dextrose agar medium (PDA, BD Difco). For solid  
104 medium, 1.5% agar was added. *A. fumigatus* conidia were obtained from mycelia cultured on  
105 AMM or PDA at 30°C for 3–7 days, harvested with PBS containing 0.05% (v/v) Tween 20 and  
106 20% (v/v) glycerol, and filtered through a 40- $\mu$ m nylon cell strainer (Greiner Bio-One,  
107 Germany).

108  
109 **DNA extraction, PCR, and sequencing.** Genomic DNA extractions and purifications were  
110 performed using a DNeasy Plant Mini Kit (QIAGEN, Germany). Primers for the amplification  
111 and sequencing of *cyp51A* are listed in Table 2. Identification was confirmed by sequencing of  
112 the internal transcribed spacer (ITS) and D1/D2 regions and the  $\beta$ -tubulin gene. PCR  
113 amplification of *cyp51A* was performed using NIID0345 genomic DNA as a template and  
114 primers Discheck5 and Discheck3 using Q5 Hot Start High-Fidelity 2 $\times$  Master Mix (New  
115 England Biolabs, Ipswich, MA).

116  
117 **sgRNA *in vitro* synthesis.** We manually searched for target sequences consisting of  
118 G(N)15(A/T)(N)3NGG near the N-terminus (for sgRNA1) and C-terminus (for sgRNA2) as

119 sgRNA target sequences and synthesized two oligonucleotides (T7-sgRNA1 and T7-sgRNA2,  
120 Table 2) consisting of the T7 promoter, sgRNA target sequence, and overlap sequence with Cas9  
121 scaffold. These oligonucleotides were used for sgRNA synthesis via the EnGen® sgRNA  
122 Synthesis Kit, *S. pyogenes* (New England Biolabs). The synthesized sgRNAs were purified using  
123 an RNA clean & concentrator-25 (Zymo Research, Irvine, CA), quantified using a QuantiFluor  
124 RNA system (Promega, Madison, WI) and Quantus Fluorometer (Promega), and used for  
125 ribonucleoprotein formation with Cas9.

126

127 **Repair templates.** A pHph plasmid harboring a hygromycin B resistance cassette (*hph*) was  
128 generated by deletion of two *loxP* sequences and HSV1 thymidine kinase sequences from  
129 pSK397 (14). Primers for the repair template construction are listed in Table 2. A region from  
130 825-bp upstream to 1503-bp downstream of the *cyp51A* coding region was used for repair  
131 templates. The mutations and *hph* marker were introduced via PCR sewing or overlap extension  
132 PCR. The *hph* marker for selection of transformants was inserted between nucleotides 500 and  
133 501 downstream of the *cyp51A* stop codon. Q5 Hot Start High-Fidelity 2× Master Mix (New  
134 England Biolabs) was used for PCR amplification. Primer combinations for overlap extension  
135 PCR are listed in Table 3. Briefly, NIID0345 or AfS35 genomic DNA was used as a template to  
136 generate overlapping PCR products with the corresponding site-specific mutations or junctions  
137 between *cyp51A* and the *hph* marker. The overlapping PCR products were mixed together and  
138 used as a template in the PCR-sewing step using the primers LFH1 and LFH4. Overlapping PCR  
139 product combinations are listed in Table 4. The fused PCR products were purified using a  
140 NucleoSpin® Gel and PCR Clean-up kit (Takarabio, Japan) and used for *A. fumigatus* protoplast  
141 transformation.

142

143 ***A. fumigatus* transformation.** *A. fumigatus* protoplasts were generated and fungal  
144 transformation was performed as previously described (13), with slight modifications. Briefly,  
145 conidia were incubated in YG medium for 6 h at 37°C. Following incubation, the cell walls of  
146 germlings were digested with 0.2 g/mL VinoTaste Pro (Novozymes, Denmark) for 1 h at 30°C;  
147 20 pmol Cas9-NLS protein (New England Biolabs) and 10 pmol each *in vitro*-synthesized  
148 sgRNA1 and sgRNA2 were mixed and incubated for 25 min, generating ribonucleoproteins  
149 (RNPs). Protoplasts were transformed with 2–3 µg of repair templates and RNPs and plated onto  
150 CD supplemented with 1 M sucrose. Using NIID0345 clinical isolate as a host, repair templates  
151 0345-mut1-S138-K248-mut2-hph, 0345-mut1-G138-K248-mut2-hph,  
152 0345-mut1-S138-N248-mut2-hph, or 0345-mut1-G138-N248-mut2-hph were used to generate  
153 strains NIID0345-mut1-2, NIID0345-S138G, NIID0345-K248N, or NIID0345-S138G-K248N,  
154 respectively. Using AfS35 strain as a host, repair templates 35-mut1-G138-mut2-hph or  
155 35-mut1-S138-mut2-hph were used to generate strains AfS35-mut1-2 or AfS35-G138S,  
156 respectively. Following a 15-h incubation at 37°C, plates were overlaid with CD top agar  
157 containing 400 µg/mL hygromycin. Positive colonies were confirmed by colony PCR using  
158 KOD FX Neo DNA polymerase (TOYOBO, Japan) with the primers Discheck5 and Discheck3  
159 (which were designed at the region outside the repair template sequence), followed by nucleotide  
160 sequencing of *cyp51A*, including the promoter region.

161

162 **Antifungal susceptibility testing.** Susceptibility to VRC, ITC, and POS were evaluated with  
163 Etest strips according to the manufacturer's instruction (Biomerieux, France). Strains were  
164 grown at 37°C, and growth inhibition was visually evaluated after 48 h. Susceptibility tests were



165 performed in three independent Cyp51A-sequence-confirmed transformants for each strain.

166 **Results**

167 **Gly138Ser and Asn248Lys were found in the Cyp51A sequence of an azole-resistant clinical**  
168 **isolate.**

169 The susceptibilities of the clinical isolate from a patient with CPPA were determined by Etest  
170 methods. The isolate was not susceptible to VRC, ITC, or POS (Fig.1), but was susceptible to  
171 amphotericin B, micafungin, and caspofungin (data not shown). We identified NIID0345 as an *A.*  
172 *fumigatus* strain via sequence analysis of the ITS and D1/D2 regions and the  $\beta$ -tubulin gene.  
173 Comparison of *cyp51A* from the azole-resistant isolate (NIID0345) with those from  
174 azole-susceptible strains (Af293 and AfS35) revealed that NIID0345 carried two amino acid  
175 substitutions: Gly138Ser (GGC→AGC) and Asn248Lys (AAT→AAA). These results indicated  
176 that one or both of these SNPs may be responsible for azole resistance.

177

178 **Cas9/CRISPR-mediated substitution of Serine at 138 to Glycine in *cyp51A* of NIID0345.**

179 To verify which SNP is involved in azole resistance, we substituted the nucleotide sequences  
180 corresponding to amino acid Ser138 and/or Lys248 in the clinical isolate NIID0345. We  
181 attempted to replace the genomic *cyp51A* gene locus with a linear DNA fragment harboring  
182 mutations by homologous recombination. It is well known that the rate of homologous  
183 recombination is very low in a host strain having an NHEJ repair pathway, such as clinical  
184 isolates. In addition, the Cas9/CRISPR system can be used to increase the efficiency of  
185 homologous recombination in *Candida glabrata* (15). Therefore, we used Cas9/CRISPR to  
186 create double-stranded breaks close to the N- and C-terminus of the *cyp51A* coding region, and  
187 to facilitate the replacement of the genomic *cyp51A* locus with a repair template DNA fragment  
188 via homologous recombination. Off-target effects are commonly encountered when Cas9 and

189 sgRNA are continuously expressed via the introduction of plasmid or DNA; however, recent  
190 studies have shown that off-target effects were reduced by the direct introduction of the Cas9  
191 protein and synthesized gRNA (16). Successful genome editing via the introduction of  
192 Cas9-gRNA ribonucleoprotein has also been reported in filamentous fungi, such as *A. fumigatus*.  
193 In the repair template DNA fragment, the nucleotide sequence responsible for amino acid  
194 substitutions thought to confer azole resistance in NIID0345 was substituted for a nucleotide  
195 sequence corresponding to that present in the azole-sensitive isolates. Furthermore, the construct  
196 was made Cas9/CRISPR resistant by introducing nuclease-resistant silent mutations into the two  
197 *cyp51A* gRNA target sites (Fig. 2). Cas9/sgRNA ribonucleoproteins and the repair template were  
198 simultaneously transformed via the protoplast-polyethylene glycol method into the *A. fumigatus*  
199 azole-resistant clinical isolate, and the transformants were selected with hygromycin. By  
200 confirming the nucleotide sequence of colony-directed PCR fragments of *cyp51A*, four kinds of  
201 recombinant strains were produced: a strain with only the nuclease-resistant mutation, those with  
202 Ser138Gly substitution, those with Lys248Asn substitution, and those with both Ser138Gly and  
203 Lys248Asn substitutions.

204

205 Next, we examined azole susceptibility testing using Etest strips on the constructed recombinant  
206 strains. The strains in which only nuclease-resistant silent mutations were introduced  
207 demonstrated a similar azole-resistant profile as the parental strain NIID0345 (Fig. 3A),  
208 indicating that Cas9/CRISPR-mediated homologous recombination had no effect on azole  
209 susceptibility. Both of the recombinant strains with Ser138Gly and Ser138Gly/Lys248Asn amino  
210 acid substitutions showed increased susceptibilities to all azoles tested, whereas the strain with  
211 only Lys248Asn substitution showed a similar azole-resistant profile to the parental clinical

212 isolate. These results indicate that Lys248 is not associated with azole resistance, and Ser138 is  
213 responsible for azole resistance in this clinical isolate.

214

215 **Gly 138 was substituted in the azole-susceptible strain AfS35.**

216 To verify whether Gly138 in Cyp51A is responsible for azole resistance, amino acid substitution  
217 of Gly138 to serine was introduced into the azole-susceptible strain AfS35. The method to  
218 produce the recombinant strain was the same as above; however, highly efficient homologous  
219 recombination was expected because the strain AfS35 is deficient in the NHEJ repair system. As  
220 expected, almost all transformants exhibited ideal recombination. We constructed two kinds of  
221 recombinant strains: a strain with only nuclease-resistant silent mutations and one in which  
222 Gly138 was substituted with Ser138. Azole susceptibility testing by Etest of the recombinant  
223 strains showed a slight decrease in azole susceptibility when the Ser138 mutation was introduced  
224 into the azole-susceptible strain AfS35 (Fig. 3B). The strain with only nuclease-resistant silent  
225 mutations demonstrated a similar azole susceptibility profile as the parental strain AfS35. From  
226 these results, we elucidated the direct involvement of Gly138 in Cyp51A in azole resistance,  
227 which had previously been supported only by indirect epidemiological evidence.

## 228 **Discussion**

229 The Cas9/CRISPR genome editing technique used in this study has enabled site-directed  
230 mutagenesis, altering Ser138 to glycine on the genomic *Cyp51A* locus in an azole-resistant  
231 clinical strain. This is, to our knowledge, the first example of site-directed mutagenesis  
232 performed in a clinical, azole-resistant fungal isolate to elucidate whether azole susceptibility is  
233 altered by mutations in the genomic *Cyp51A* locus. Although many azole-resistant isolates with  
234 SNPs in *cyp51A* have been identified, there have been few studies that genetically confirm their  
235 correspondence to low azole susceptibility. Although genetically recombinant strains harboring  
236 mutations such as TR34-Leu98His (17), TR46-Tyr121Phe-Thr289Ala (18), Gly54Trp (17), and  
237 Thr301Ile (19) in the genomic *Cyp51A* locus have been reported to date, all these strains were  
238 constructed in the *akuB*/Ku80-deficient strain as a recipient. It is well known that wild-type  
239 strains, such as clinical isolates, tend to exhibit low efficiency in homologous recombination,  
240 largely because of high NHEJ activity. To overcome this limitation, the gene encoding either  
241 KU70 or Ku80, which are the components of NHEJ machinery, was knocked out, leading to a  
242 significant increase in the frequency of homologous recombination (14, 20). In contrast, our  
243 method using Cas9/CRISPR can facilitate efficient homologous recombination without the  
244 inactivation of the NHEJ pathway, which is supported by previous studies, concluding that the  
245 frequency of homologous recombination can be increased by the Cas9/CRISPR system in *C.*  
246 *glabrata* (15).

247

248 To build the Cas9/CRISPR system in *A. fumigatus* clinical isolates, we incorporated several  
249 additional methods to improve the efficiency and accuracy of *cyp51A* gene replacement events.  
250 Improved efficiency of *cyp51A* replacement was achieved by introducing two DSBs via the

251 design of two target sequences for sgRNA at sites close to the N-terminus and C-terminus,  
252 repressing homologous recombination within the *cyp51A* coding region. Additionally, to avoid  
253 digestion of the repair template and re-digestion of the edited target after the homologous  
254 recombination event, nuclease-resistant silent mutations were introduced in two loci of three  
255 codons immediately upstream from the PAM sites of the repair template, preventing it from  
256 being targeted by Cas9/CRISPR(21). To minimize off-target effects from DNA-based continuous  
257 Cas9 and sgRNA expression (which should be considered whenever Cas9/CRISPR system is  
258 used for genome editing), we introduced ribonucleoproteins consisting of commercially available  
259 recombinant Cas9 protein and *in vitro*-synthesized sgRNAs directly into protoplasts of clinical  
260 isolates. As one means of minimizing off-target effects, directly transfected Cas9 protein reduces  
261 the off-target cleavage rate when compared with Cas9 expression by a plasmid or mRNA  
262 transfection in mammalian cells (16). One recent study has demonstrated that direct delivery of  
263 Cas9–gRNA ribonucleoprotein can facilitate genome editing in *A. fumigatus* (10). Based on these  
264 improvements, we produced a simple, efficient, and accurate site-directed mutagenesis system to  
265 investigate structure–phenotype relationships of the azole target Cyp51A. Since this system can  
266 be applied to numerous genes other than *cyp51A*, this method will accelerate the progress of  
267 many pathogenic fungal studies.

268

269 Multiple Gly138 polymorphisms in *cyp51A* have been identified in *A. fumigatus* azole-resistant  
270 isolates, most of which alter Gly/GGC to Cys/TGC and Ser/AGC (22-25). Although  
271 *Saccharomyces cerevisiae* expressing *cyp51A* with the Gly138Cys mutation showed reduced  
272 susceptibility to all three azoles compared with the control strain, no genetic studies using *A.*  
273 *fumigatus* as a host have been performed to date to investigate the function of Gly138 in

274 Cyp51A. We isolated an azole-resistant *A. fumigatus* strain from a CPPA patient with long-term  
275 VRC treatment and identified two amino acid substitutions—Gly138Ser and  
276 Asn248Lys—which, when compared with Cyp51A nucleotide sequences from azole-susceptible  
277 strains, may be potential polymorphisms conferring azole resistance. According to the homology  
278 model structure of the Cyp51A protein, Gly138 is located in a channel 1 helix close to the heme  
279 cofactor, and a mutation at this position could disturb the heme environment, which may lead to  
280 multiple azole resistance (26, 27). Structure modeling and epidemiology have predicted that the  
281 Gly138Ser mutation is the amino acid responsible for azole resistance, and our Cas9/CRISPR  
282 gene replacement system has molecularly confirmed that the Ser138 is responsible for the  
283 pan-azole-resistant phenotype in the clinical isolate NIID0345. However, genome-edited mutants  
284 harboring Gly138 in the NIID0345 genetic background have exhibited much lower susceptibility  
285 to all azoles tested than the strain Afs35, in which the amino acid at position 138 is intrinsically  
286 glycine. Similarly, the genome-edited mutant harboring Ser138 in Afs35 genetic background has  
287 exhibited higher susceptibility than the strain NIID0345, in which the amino acid at position 138  
288 is intrinsically serine. These results indicate that the strain NIID0345 may have low azole  
289 susceptibility for reasons other than alteration in *cyp51A*. Additional genomic analysis is needed  
290 to identify unknown, non-Cyp51A mechanisms of azole resistance in the clinical isolate  
291 NIID0345.

292

293 In conclusion, we have developed a simple, efficient, and accurate gene replacement system  
294 using Cas9/CRISPR genome editing techniques, and applied these techniques to investigate the  
295 mechanisms of azole resistance via Cyp51A alteration. We confirm at the molecular level that the  
296 Gly138Ser mutation is one reason for azole resistance in a clinical isolate. There are many

297 *cyp51A* mutations that may result in potential, but unconfirmed amino acid changes conferring  
298 azole resistance. Further investigation of Cyp51A using our Cas9/CRISPR system is required to  
299 verify whether the diverse SNPs reported to date are in fact responsible for azole resistance.

300

301 **Acknowledgment.**

302 We thank Hiroko Tomuro for technical assistance. This work was supported by MEXT  
303 KAKENHI Grant Number JP126K09954 and Joint Usage/Research Program of Medical  
304 Mycology Research Center, Chiba University (17-9). The authors would like to thank Enago  
305 ([www.enago.jp](http://www.enago.jp)) for the English language review.

306 We declare the authors have no conflicts of interest.



## 307 **References**

- 308 1. **Kohno S, Tamura K, Niki Y, Izumikawa K, Oka S, Ogawa K, Kadota J, Kamei K, Kanda Y,**  
309 **Kiuchi T, Shibuya K, Takakura S, Takata T, Takesue Y, Teruya K, Tokimatsu I, Fukuda T,**  
310 **Maesaki S, Makimura K, Mikamo H, Mitsutake K, Miyazaki Y, Mori M, Yasuoka A, Yano K,**  
311 **Yamanaka N, Yoshida M.** 2016. Executive Summary of Japanese Domestic Guidelines for  
312 Management of Deep-seated Mycosis 2014. *Med Mycol J* 57:E117–E163.
- 313 2. **Denning DW, Venkateswarlu K, Oakley KL, Anderson MJ, Manning NJ, Stevens DA, Warnock**  
314 **DW, Kelly SL.** 1997. Itraconazole resistance in *Aspergillus fumigatus*. *Antimicrobial Agents and*  
315 *Chemotherapy* 41:1364–1368.
- 316 3. **Resendiz Sharpe A, Lagrou K, Meis JF, Chowdhary A, Lockhart SR, Verweij PE,**  
317 **ISHAM/ECMM Aspergillus Resistance Surveillance working group.** 2018. Triazole resistance  
318 surveillance in *Aspergillus fumigatus*. *Med Mycol* 56:83–92.
- 319 4. **Diaz-Guerra TM, Mellado E, Cuenca-Estrella M, Rodriguez-Tudela JL.** 2003. A point mutation in  
320 the 14alpha-sterol demethylase gene *cyp51A* contributes to itraconazole resistance in *Aspergillus*  
321 *fumigatus*. *Antimicrobial Agents and Chemotherapy* 47:1120–1124.
- 322 5. **Doudna JA, Charpentier E.** 2014. Genome editing. The new frontier of genome engineering with  
323 CRISPR-Cas9. *Science* 346:1258096–1258096.
- 324 6. **Jinek M, Chylinski K, Fonfara I, Hauer M, Doudna JA, Charpentier E.** 2012. A programmable  
325 dual-RNA-guided DNA endonuclease in adaptive bacterial immunity. *Science* 337:816–821.
- 326 7. **Mojica FJM, Díez-Villaseñor C, García-Martínez J, Almendros C.** 2009. Short motif sequences  
327 determine the targets of the prokaryotic CRISPR defence system. *Microbiology* 155:733–740.
- 328 8. **Ran FA, Hsu PD, Lin C-Y, Gootenberg JS, Konermann S, Trevino AE, Scott DA, Inoue A,**  
329 **Matoba S, Zhang Y, Zhang F.** 2013. Double nicking by RNA-guided CRISPR Cas9 for enhanced  
330 genome editing specificity. *Cell* 154:1380–1389.
- 331 9. **Shalem O, Sanjana NE, Hartenian E, Shi X, Scott DA, Mikkelsen T, Heckl D, Ebert BL, Root DE,**  
332 **Doench JG, Zhang F.** 2014. Genome-scale CRISPR-Cas9 knockout screening in human cells. *Science*  
333 343:84–87.

- 334 10. **Abdallah Al Q, Ge W, Fortwendel JR.** 2017. A Simple and Universal System for Gene Manipulation  
335 in *Aspergillus fumigatus*: In Vitro-Assembled Cas9-Guide RNA Ribonucleoproteins Coupled with  
336 Microhomology Repair Templates. *mSphere* 2:e00446-17.
- 337 11. **Zhang C, Meng X, Wei X, Lu L.** 2016. Highly efficient CRISPR mutagenesis by  
338 microhomology-mediated end joining in *Aspergillus fumigatus*. *Fungal Genet Biol* 86:47–57.
- 339 12. **Fuller KK, Chen S, Loros JJ, Dunlap JC.** 2015. Development of the CRISPR/Cas9 System for  
340 Targeted Gene Disruption in *Aspergillus fumigatus*. *Eukaryotic Cell* 14:1073–1080.
- 341 13. **Szewczyk E, Nayak T, Oakley CE, Edgerton H, Xiong Y, Taheri-Talesh N, Osmani SA, Oakley  
342 BR, Oakley B.** 2006. Fusion PCR and gene targeting in *Aspergillus nidulans*. *Nat Protoc* 1:3111–3120.
- 343 14. **Krappmann S, Sasse C, Braus GH.** 2006. Gene targeting in *Aspergillus fumigatus* by homologous  
344 recombination is facilitated in a nonhomologous end- joining-deficient genetic background. *Eukaryotic  
345 Cell* 5:212–215.
- 346 15. **Enkler L, Richer D, Marchand AL, Ferrandon D, Jossinet F.** 2016. Genome engineering in the  
347 yeast pathogen *Candida glabrata* using the CRISPR-Cas9 system. *Sci Rep* 6:35766.
- 348 16. **Liang X, Potter J, Kumar S, Zou Y, Quintanilla R, Sridharan M, Carte J, Chen W, Roark N,  
349 Ranganathan S, Ravinder N, Chesnut JD.** 2015. Rapid and highly efficient mammalian cell  
350 engineering via Cas9 protein transfection. *J Biotechnol* 208:44–53.
- 351 17. **Snelders E, Karawajczyk A, Verhoeven RJA, Venselaar H, Schaftenaar G, Verweij PE, Melchers  
352 WJG.** 2011. The structure-function relationship of the *Aspergillus fumigatus* *cyp51A* L98H conversion  
353 by site-directed mutagenesis: the mechanism of L98H azole resistance. *Fungal Genet Biol* 48:1062–  
354 1070.
- 355 18. **Snelders E, Camps SMT, Karawajczyk A, Rijs AJMM, Zoll J, Verweij PE, Melchers WJG.** 2015.  
356 Genotype-phenotype complexity of the TR46/Y121F/T289A *cyp51A* azole resistance mechanism in  
357 *Aspergillus fumigatus*. *Fungal Genet Biol* 82:129–135.
- 358 19. **Leonardelli F, Macedo D, Dudiuk C, Cabeza MS, Gamarra S, Garcia-Effron G.** 2016. *Aspergillus  
359 fumigatus* Intrinsic Fluconazole Resistance Is Due to the Naturally Occurring T301I Substitution in  
360 Cyp51Ap. *Antimicrobial Agents and Chemotherapy* 60:5420–5426.

- 361 20. **da Silva Ferreira ME, Kress MRVZ, Savoldi M, Goldman MHS, Härtl A, Heinekamp T,**  
362 **Brakhage AA, Goldman GH.** 2006. The *akuB*(KU80) mutant deficient for nonhomologous end  
363 joining is a powerful tool for analyzing pathogenicity in *Aspergillus fumigatus*. *Eukaryotic Cell* 5:207–  
364 211.
- 365 21. **Kim H, Ishidate T, Ghanta KS, Seth M, Conte D, Shirayama M, Mello CC.** 2014. A co-CRISPR  
366 strategy for efficient genome editing in *Caenorhabditis elegans*. *Genetics* 197:1069–1080.
- 367 22. **Howard SJ, Webster I, Moore CB, Gardiner RE, Park S, Perlin DS, Denning DW.** 2006.  
368 Multi-azole resistance in *Aspergillus fumigatus*. *International Journal of Antimicrobial Agents* 28:450–  
369 453.
- 370 23. **Howard SJ, Cerar D, Anderson MJ, Albarrag A, Fisher MC, Pasqualotto AC, Laverdiere M,**  
371 **Arendrup MC, Perlin DS, Denning DW.** 2009. Frequency and evolution of Azole resistance in  
372 *Aspergillus fumigatus* associated with treatment failure. *Emerg Infect Dis* 15:1068–1076.
- 373 24. **Albarrag AM, Anderson MJ, Howard SJ, Robson GD, Warn PA, Sanglard D, Denning DW.** 2011.  
374 Interrogation of related clinical pan-azole-resistant *Aspergillus fumigatus* strains: G138C, Y431C, and  
375 G434C single-nucleotide polymorphisms in *cyp51A*, upregulation of *cyp51A*, and integration and  
376 activation of transposon *AtfI* in the *cyp51A* promoter. *Antimicrobial Agents and Chemotherapy*  
377 55:5113–5121.
- 378 25. **Wiederhold NP, Gil VG, Gutierrez F, Lindner JR, Albatineh MT, McCarthy DI, Sanders C,**  
379 **Fan H, Fothergill AW, Sutton DA.** 2015. First Detection of TR34/L98H and TR46/Y121F/T289A  
380 *Cyp51* Mutations in *Aspergillus fumigatus* isolates in the United States. *Journal of Clinical*  
381 *Microbiology* JCM.02478–15.
- 382 26. **Xiao L, Madison V, Chau AS, Loebenberg D, Palermo RE, McNicholas PM.** 2004.  
383 Three-dimensional models of wild-type and mutated forms of cytochrome P450 14 $\alpha$ -sterol  
384 demethylases from *Aspergillus fumigatus* and *Candida albicans* provide insights into posaconazole  
385 binding. *Antimicrobial Agents and Chemotherapy* 48:568–574.
- 386 27. **Snelders E, Karawajczyk A, Schaftenaar G, Verweij PE, Melchers WJG.** 2010. Azole resistance  
387 profile of amino acid changes in *Aspergillus fumigatus* CYP51A based on protein homology modeling.

388 Antimicrobial Agents and Chemotherapy 54:2425–2430.

389

390 **Figure Legends**

391 Figure 1. Antifungal susceptibility testing using Etest strips for voriconazole, itraconazole, and  
392 posaconazole in the azole-susceptible *Aspergillus fumigatus* strain AfS35 and clinical  
393 azole-resistant *A. fumigatus* strain NIID0345. The number below each photo represents the MIC  
394 ( $\mu\text{g/mL}$ ).

395

396 Figure 2. Overview of genetic modification via Cas9/CRISPR-promoted homology-directed  
397 repair. (a) Cas9 protein and *in vitro*-synthesized sgRNAs were mixed to form two RNPs. The  
398 repair template and two RNPs were transformed into *Aspergillus fumigatus* protoplasts. (b) The  
399 dual Cas9–sgRNA complex introduced two double-stranded breaks at the N-terminus and  
400 C-terminus of *cyp51A* (c and d). The cleaved *cyp51A* on the genomic DNA is replaced by the  
401 repair template, resulting in the introduction of the desired mutations and *hph* marker. The silent  
402 mutations mut1 and mut2 on the repair template and the replaced genomic DNA cannot be  
403 cleaved by RNPs nuclease.

404

405 Figure 3. Antifungal susceptibility testing using Etest strips for voriconazole, itraconazole, and  
406 posaconazole for the strains generated via Cas9/CRISPR-promoted gene replacement from the  
407 strains NIID0345 (A) and AfS35 (B). The number below each photo represents the MIC  
408 ( $\mu\text{g/mL}$ ).

409 **Table 1. *Aspergillus fumigatus* strains used in this study.**

| Strain               | Parent           | Genotype <sup>a</sup>             | Source                      |
|----------------------|------------------|-----------------------------------|-----------------------------|
| NIID0345             | clinical isolate |                                   | Current study               |
| NIID0345-mut1-2      | NIID0345         | mut1 mut2 <i>cyp51A hph</i>       | Current study               |
| NIID0345-S138G       | NIID0345         | mut1 S138G mut2 <i>cyp51A hph</i> | Current study               |
| NIID0345-K248N       | NIID0345         | mut1 K248N mut2 <i>cyp51A hph</i> | Current study               |
| NIID0345-S138G-K248N | NIID0345         | mut1 mut2 <i>cyp51A hph</i>       | Current study               |
| AfS35                | D141             | <i>akuAΔloxP</i>                  | Fungal genetic stock center |
| AfS35-mut1-2         | AfS35            | mut1 mut2 <i>cyp51A hph</i>       | Current study               |
| AfS35-G138S          | AfS35            | mut1 G138S mut2 <i>cyp51A hph</i> | Current study               |

410 <sup>a</sup> mut1 and mut2 are silent mutations for Cas9-nuclease resistance.

411 **Table 2. Oligonucleotide primers used in this study.**

| Primer    | Sequence (5'-3') <sup>a</sup>                                            | Orientation | Use                                                    |
|-----------|--------------------------------------------------------------------------|-------------|--------------------------------------------------------|
| Discheck5 | ATGCAGTGAAAAATTCCTAGCAG                                                  | Sense       | cyp51A amplification and verification of transformants |
| Discheck3 | ATGGTGGTGGTCAAGGTTTCAGCAG                                                | Antisense   | cyp51A amplification and verification of transformants |
| T7-sgRNA1 | <u>TTCTAATACGACTCACTATAGCTATGGCTTACGGCCT</u><br><u>ACAGTTTTAGAGCTAGA</u> | Sense       | in vitro sgRNA synthesis                               |
| T7-sgRNA2 | <u>TTCTAATACGACTCACTATAGGGATGAATAGTCAGTT</u><br><u>TCAGTTTTAGAGCTAGA</u> | Antisense   | in vitro sgRNA synthesis                               |
| LFH1      | GCGAGCCATGCTGGGAGGAATCTC                                                 | Sense       | Repair template construction and amplification         |
| Mut1-3    | CGGCCATATACGCGGTAAGCCATAGCATCGGCAC                                       | Antisense   | Repair template construction                           |
| Mut1-5    | GGCTTACCGCGTATATGGCCGTTGCGGTGCTGAC                                       | Sense       | Repair template construction                           |
| G138-3    | TGAGTCAAGCCGTAAGTCTGATGAACTTTTCTGCTC                                     | Antisense   | Repair template construction                           |
| G138-5    | CATCAAGTACGGCTTACTCAGTCTGCGTTAGAG                                        | Sense       | Repair template construction                           |
| S138-3    | TGAGTCAAGCTGTACTTATGATGAACTTTTCTGCTC                                     | Antisense   | Repair template construction                           |
| S138-5    | CATCAAGTACAGCTTACTCAGTCTGCGTTAGAG                                        | Sense       | Repair template construction                           |
| N248-3    | GACGGCGCTGATTGATGATGTCAACGTAGATTGAC                                      | Antisense   | Repair template construction                           |
| N248-5    | ACATCATCAATCAGCGCCGCTTACGGTGACAAG                                        | Sense       | Repair template construction                           |
| Mut2-3    | AGTCAGTCTCTGGCACTCCTTTCTTTCCATCCAC                                       | Antisense   | Repair template construction                           |
| Mut2-5    | AAGGAGTGCCAGAGACTGACTATTATCCCTC                                          | Sense       | Repair template construction                           |
| LFH6      | GATATCGGCCTGAGTGGCCTCCAGGTTTTCGCACGA<br>GCTTCTCC                         | Antisense   | Repair template construction                           |
| LFH3      | GTTGTGCGACGGCCATCTAGGCCAGTTTTTGATAGTCT<br>TCAAAAGTCAG                    | Sense       | Repair template construction                           |
| LFH4      | CGTATTGGTGAGCTGATGATCATC                                                 | Antisense   | Repair template construction and amplification         |
| Hph5      | GAGGCCACTCAGGCCGATATCACC                                                 | Sense       | hph cassette amplification                             |
| Hph3      | CTGGCCTAGATGGCCGTCGACAAC                                                 | Antisense   | hph cassette amplification                             |
| proseq3   | TTAGTAATTAGGCAACTTTCATTC                                                 | Antisense   | cyp51A sequencing                                      |
| seq1      | CCAATGGTCTTTCATTGGGTC                                                    | Sense       | cyp51A sequencing                                      |
| seq1r     | TCCCGTAACTGATGGTACTAC                                                    | Antisense   | cyp51A sequencing                                      |
| seq2      | TTTACCGCTGCTCGAGCCCTC                                                    | Sense       | cyp51A sequencing                                      |
| seq2r     | GGAACGAACTTCCCTGGCCTTG                                                   | Antisense   | cyp51A sequencing                                      |
| seq3      | AACTTCCCTTCCATCAACATG                                                    | Sense       | cyp51A sequencing                                      |
| seq3r     | CGAATAACATGTTGATGGAAG                                                    | Antisense   | cyp51A sequencing                                      |

412 <sup>a</sup> Letters in bold indicate the mutated nucleotide. Underlining indicates an additional sequence

413 for in vitro gRNA synthesis.

414 **Table3. Combination of primers for overlapping PCR used in this study.**

| Name of PCR product | Primers       | Template DNA         |
|---------------------|---------------|----------------------|
| 0345-A              | LFH1/Mut1-3   | NIID0345 genomic DNA |
| 0345-mut1-G138      | Mut1-5/G138-3 | NIID0345 genomic DNA |
| 0345-mut1-N248      | Mut1-5/N248-3 | NIID0345 genomic DNA |
| 0345-mut1-mut2      | Mut1-5/Mut2-3 | NIID0345 genomic DNA |
| 0345-G138-mut2      | G138-5/Mut2-3 | NIID0345 genomic DNA |
| 0345-G138-N248      | G138-5/N248-3 | NIID0345 genomic DNA |
| 0345-N248-mut2      | N248-3/Mut2-3 | NIID0345 genomic DNA |
| 0345-C              | Mut2-5/LFH6   | NIID0345 genomic DNA |
| 0345-B              | LFH3/LFH4     | NIID0345 genomic DNA |
| 35-A                | LFH1/Mut1-3   | AfS35 genomic DNA    |
| 35-mut1-mut2        | Mut1-5/Mut2-3 | AfS35 genomic DNA    |
| 35-mut1-S138        | Mut1-5/S138-3 | AfS35 genomic DNA    |
| 35-S138-mut2        | S138-5/Mut2-3 | AfS35 genomic DNA    |
| 35-C                | Mut2-5/LFH6   | AfS35 genomic DNA    |
| 35-B                | LFH3/LFH4     | AfS35 genomic DNA    |
| Hph                 | Hph5/Hph3     | pHph plasmid DNA     |



415 **Table 4. Combination of PCR products for repair template amplification used in this study.**

| Name of repair template      | PCR products                                                                   |
|------------------------------|--------------------------------------------------------------------------------|
| 0345-mut1-S138-K248-mut2-hph | 0345-A, 0345-mut1-mut2, 0345-C, Hph, 0345-B                                    |
| 0345-mut1-G138-K248-mut2-hph | 0345-A, 0345-mut1-G138, 0345-G138-mut2,<br>0345-C, Hph, 0345-B                 |
| 0345-mut1-S138-N248-mut2-hph | 0345-A, 0345-mut1-N248, 0345-N248-mut2,<br>0345-C, Hph, 0345-B                 |
| 0345-mut1-G138-N248-mut2-hph | 0345-A, 0345-mut1-G138, 0345-G138-N248,<br>0345-N248-mut2, 0345-C, Hph, 0345-B |
| 35-mut1-G138-mut2-hph        | 35-A, 35-mut1-mut2, 35-C, Hph, 35-B                                            |
| 35-mut1-S138-mut2-hph        | 35-A, 35-mut1-S138, 35-S138-mut2, 35-C, Hph,<br>35-B                           |

416

Fig. 1

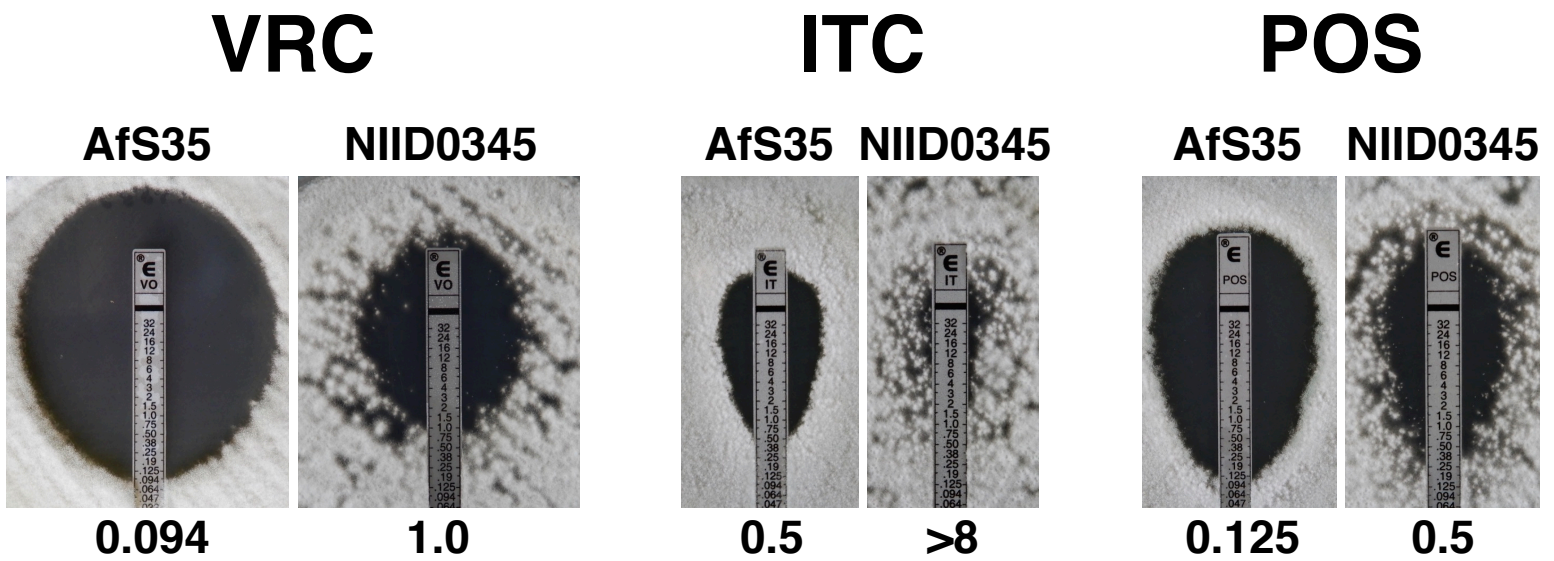

Fig. 2

**a**

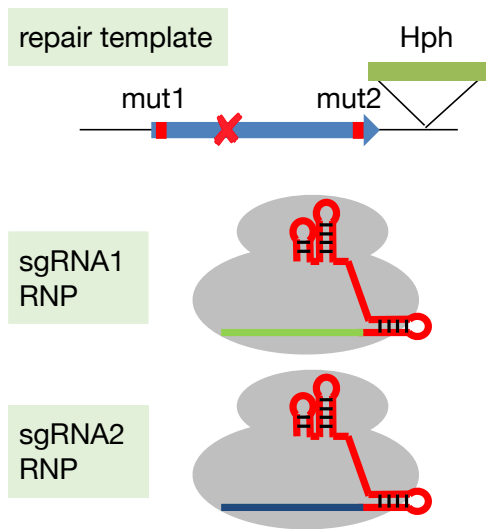

transformation

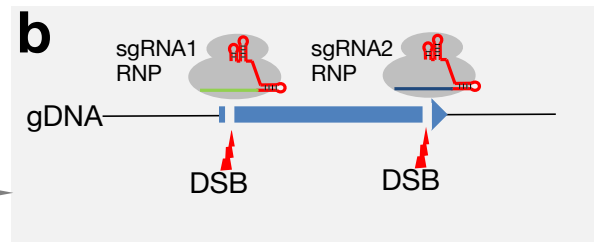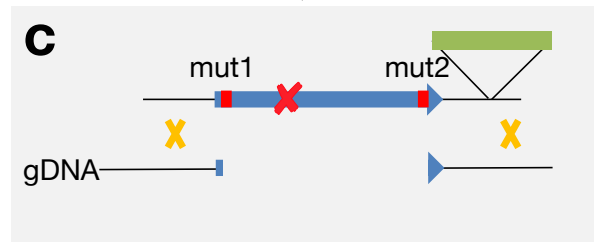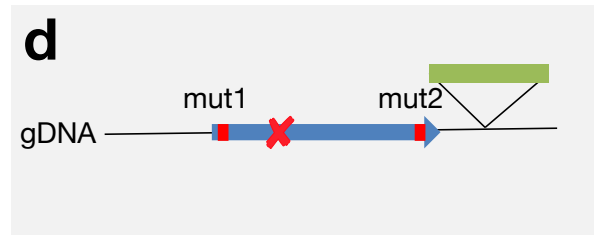

Fig. 3

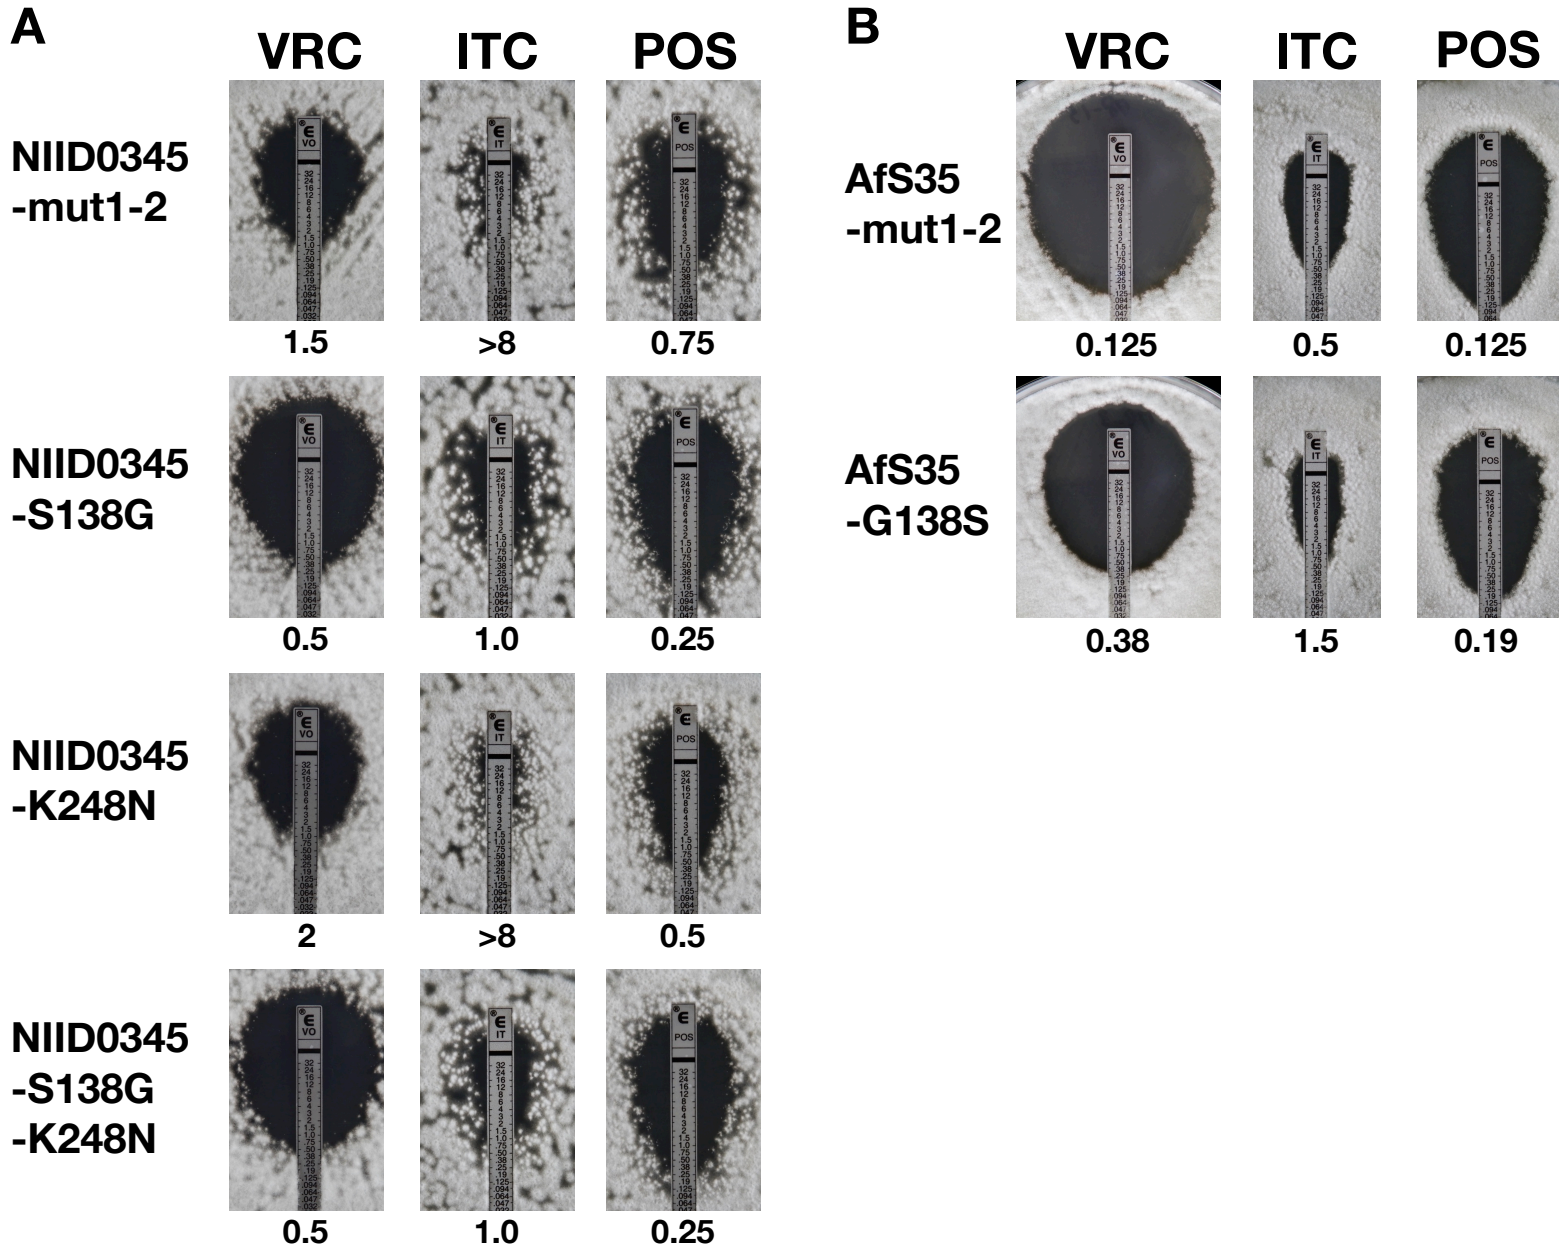

Source: https://www.biorxiv.org/content/10.1101/311712v1.full.pdf
